# Supplementary material for: Exploring Allied Health Models of Care for Children with Developmental Health Concerns, Delays, and Disabilities in Rural and Remote Areas: A Systematic Scoping Review
Source: MDPI journal article supplement (doi:10.3390/ijerph21040507), 2024-04-19
Supplement: s1 [file s1]

## Supplementary File S1: MEDLINE SEARCH SYNTAX

1. exp Child/
2. exp Infant/
3. Adolescent/
4. Pediatrics/
5. Child Health/
6. Disabled Children/
7. (child\* or preschool\* or pre school\* or school age\* or schoolage\* or schoolchild\* or pediatric\* or paediatric\* or peadiatric\* or infant\* or newborn\* or neonate\* or baby or babies or boy or boys or girl or girls or youth or adolescen\* or teen\* or juvenil\* or prepubsecen\* or pubescent\* or preteen\* or kid or kids or puber\* or toddler\*).ti,ab,kf.
8. or/1-7
9. Allied Health Personnel/
10. Community Health Services/
11. Community Health Workers/
12. Physical Therapist Assistants/
13. Speech-Language Pathology/
14. Allied Health Occupations/
15. Occupational Therapy/
16. Occupational Therapists/
17. Physical Therapy Specialty/
18. Physical Therapy Modalities/
19. Physical Therapists/
20. Social Workers/
21. Social Work/
22. Dietetics/
23. Nutritionists/
24. Podiatry/
25. Early Intervention, Educational/
26. Psychology/ and (therap\* or service\* or clinic\* or intervention\* or program\* or appointment\*).ti,ab,kf.
27. (allied health or community health or physical therap\* or physiotherap\* or audiolog\* or ((Speech or Language) adj3 (therap\* or patholog\*)) or occupational therap\* or social service\* or social intervention\* or social work\* or dietetics or dietician\* or nutritionist\* or psychologist\* or (psycholog\* and (therap\* or service\* or clinic\* or intervention\* or program\* or appointment\*)) or podiatr\* or chiropod\* or early intervention\* or head start program\*).ti,ab,kf.
28. or/9-27
29. 8 and 28
30. Child Health Services/
31. 29 or 30
32. Developmental Disabilities/
33. exp Child Development/
34. Child Behavior Disorders/
35. Intellectual Disability/
36. Language Development Disorders/
37. neurodevelopmental disorders/
38. motor skills disorders/
39. Learning Disabilities/

40. ((development\* or neurodevelopment\* or motor or intellectual or language or speech or psychological or physical or learning or behavior\*) adj3 (delay\* or vulnerab\* or problem\* or disab\* or disorder\* or deviat\*)).ti,ab,kf.
41. ((child\* or infant\*) adj3 development\*).ti,ab,kf.
42. or/32-41
43. Rural Health/
44. Rural Health Services/
45. Rural Population/
46. Hospitals, Rural/
47. (rural\* or regional or remote\* or non urban or non metro\* or nonurban or nonmetro\* or geographic\* isolat\* or farming communit\* or agricultural communit\* or small town\*).ti,ab,kf.
48. or/43-47
49. 31 and 42 and 48
